# Supplementary material for: Impacts of Digital Healthy Diet Literacy and Healthy Eating Behavior on Fear of COVID-19, Changes in Mental Health, and Health-Related Quality of Life among Front-Line Health Care Workers
Source: MDPI journal article supplement (doi:10.3390/nu13082656), 2021-07-30
Supplement: s1 [file s1]

**Table S1.** Spearman correlations (*rho*) of independent variables (*n* = 2299).

|                                 | Age    | Gender | Marital status | Ability to pay for medications | Social status | Type of health care personnel | Epidemic containment experience | BMI    | Comorbidity | S-COVID-19-S | HL           | eHEALS       | DDL   |
|---------------------------------|--------|--------|----------------|--------------------------------|---------------|-------------------------------|---------------------------------|--------|-------------|--------------|--------------|--------------|-------|
| Gender                          | 0.028  |        |                |                                |               |                               |                                 |        |             |              |              |              |       |
| Marital status                  | 0.238  | -0.030 |                |                                |               |                               |                                 |        |             |              |              |              |       |
| Ability to pay for medications  | 0.019  | -0.004 | -0.001         |                                |               |                               |                                 |        |             |              |              |              |       |
| Social status                   | 0.064  | -0.052 | 0.056          | 0.178                          |               |                               |                                 |        |             |              |              |              |       |
| Type of health care personnel   | -0.056 | -0.091 | 0.026          | -0.093                         | -0.165        |                               |                                 |        |             |              |              |              |       |
| Epidemic containment experience | 0.131  | 0.023  | 0.102          | -0.005                         | 0.019         | -0.034                        |                                 |        |             |              |              |              |       |
| BMI                             | 0.041  | 0.229  | 0.066          | 0.050                          | 0.015         | -0.044                        | 0.050                           |        |             |              |              |              |       |
| Comorbidity                     | 0.107  | 0.028  | 0.056          | -0.022                         | -0.043        | -0.028                        | 0.011                           | 0.050  |             |              |              |              |       |
| S-COVID-19-S                    | -0.010 | 0.038  | -0.024         | -0.035                         | -0.054        | -0.022                        | -0.027                          | 0.048  | 0.152       |              |              |              |       |
| HL                              | 0.025  | 0.075  | 0.001          | 0.128                          | 0.048         | -0.095                        | 0.134                           | 0.037  | -0.003      | -0.076       |              |              |       |
| eHEALS                          | -0.017 | 0.123  | 0.024          | 0.067                          | 0.004         | -0.051                        | 0.080                           | 0.057  | -0.009      | -0.059       | <b>0.450</b> |              |       |
| DDL                             | 0.014  | 0.053  | 0.020          | 0.077                          | 0.053         | -0.004                        | 0.072                           | 0.028  | -0.027      | -0.102       | <b>0.680</b> | <b>0.378</b> |       |
| HES                             | 0.012  | -0.040 | 0.046          | 0.050                          | 0.020         | -0.034                        | 0.041                           | -0.030 | 0.039       | -0.037       | 0.109        | 0.048        | 0.084 |

Abbreviations: BMI, body mass index; S-COVID-19-S, suspected coronavirus disease-2019 symptoms; HL, health literacy; eHEALS, eHealth literacy scale; DDL, digital healthy diet literacy; HES, health eating score.
